# Supplementary material for: Thermoresponsive GenisteinNLC-dexamethasone-moxifloxacin multi drug delivery system in lens capsule bag to prevent complications after cataract surgery
Source: PubMed Central journal article supplement (PMC7794611; doi:10.1038/s41598-020-80476-x), 2021-01-08
Supplement: 41598_2020_80476_MOESM1_ESM.pdf [file 41598_2020_80476_MOESM1_ESM.pdf]

## **Thermoresponsive GenisteinNLC-Dexamethasone-Moxifloxacin Multi Drug Delivery System in Lens Capsule Bag to Prevent Complications after Cataract Surgery**

Tingyu Yan<sup>1</sup>, yantingyu@163.com; Zhongxu Ma<sup>2</sup>, mazhongxu@hotmail.com; Jingjing Liu<sup>1</sup>, 653673751@qq.com; Na Yin<sup>3</sup>, yinna\_pharm@163.com; Shizhen Lei<sup>1</sup>, lzssyb@163.com; Xinxin Zhang<sup>1</sup>, 394338224@qq.com; Xuedong Li<sup>1</sup>, sklddf@126.com; Yu Zhang<sup>3\*</sup>, pharmzy@163.com; Jun Kong<sup>1\*</sup>, kongjun@hotmail.com

<sup>1</sup>Department of Ophthalmology, the Fourth Affiliated Hospital of China Medical University. No.11 Xinhua Road, Heping District, Shenyang, Liaoning Province, China 110005;

<sup>2</sup>Tianjin Eye Hospital, Tianjin Key Laboratory of Ophthalmology and Vision Science, Clinical College of Ophthalmology, Tianjin Medical University. No. 4 Gansu Rd, Heping District, Tianjin, China 300020;

<sup>3</sup> Department of Pharmaceutics, Shenyang Pharmaceutical University. No.103 Wen Hua Road, Shenyang, China 110016

**Tingyu Yan and Zhongxu Ma contributed equally.**

## Supplementary information

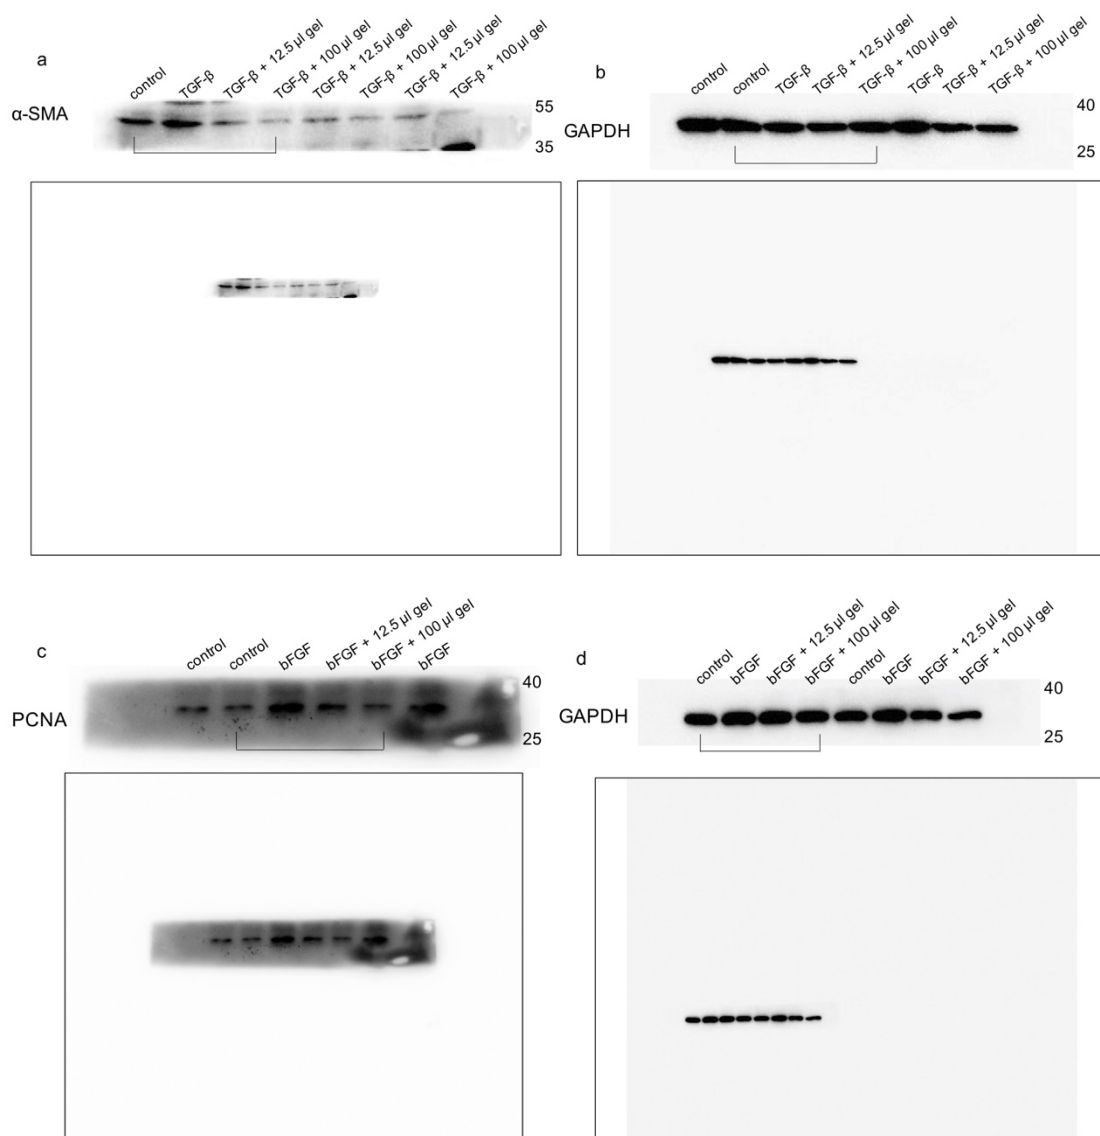

Supplementary Figure 1: Original western blot membranes for membrane strips presented in Figure 4 of the manuscript.
